# Supplementary material
Source: PubMed Central journal article supplement (PMC3914637)
Supplement: NIHMS551238-supplement-Supplementary_figures.pdf [file NIHMS551238-supplement-Supplementary_figures.pdf]

# Supplemental Fig. 1. IFN- $\gamma$ differentially regulates LPS-induced IL-12 and IL-23 mRNA expression in mouse peritoneal macrophage

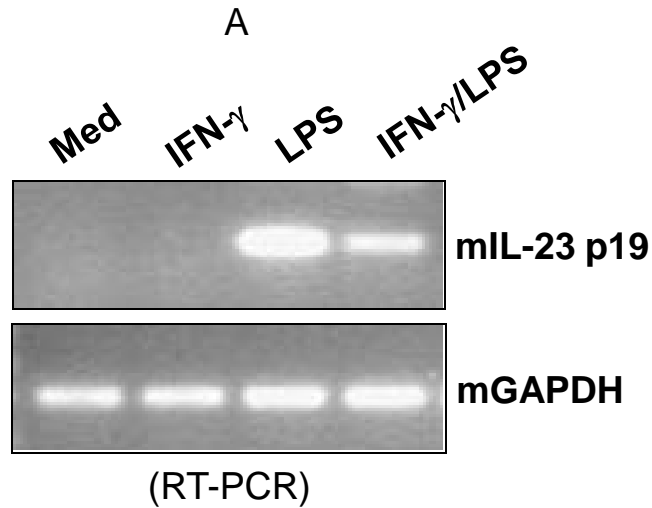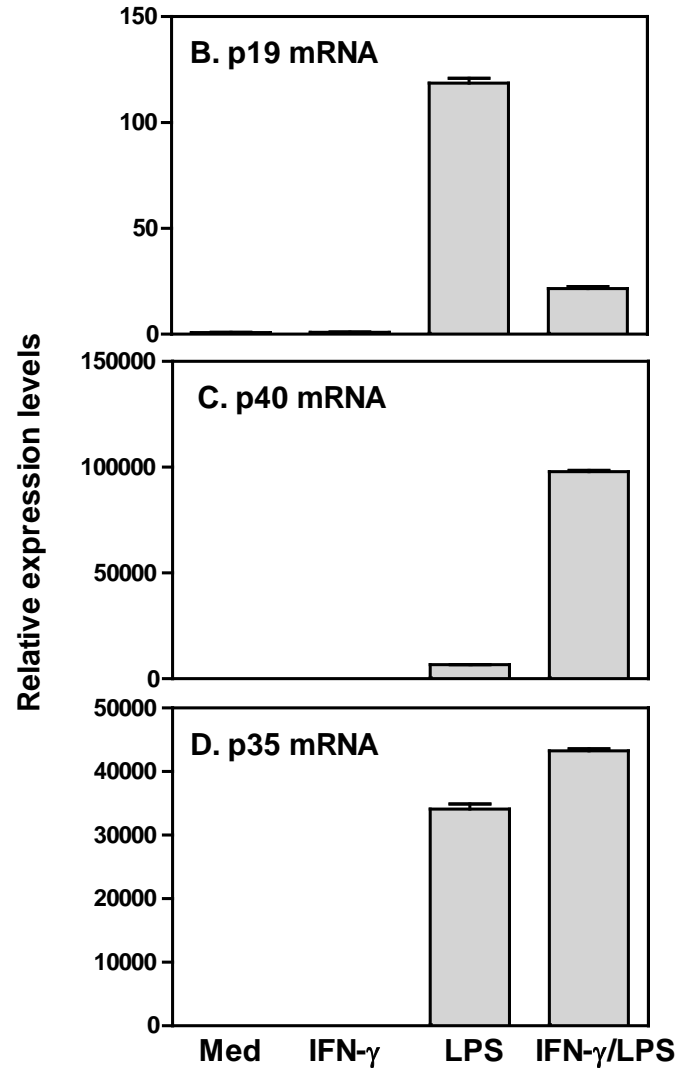

## Supplemental Fig. 2. Mouse IL-23 p19 complete cDNA

```

1      cgcttagaag tcggactaca gagttagact cagaacccaaa ggaggtggat aggggggtcca
61      caggcctggg gcagatcaca gagccagcca gatctgagaa gcaggggaaca agATGCTGGA
121     TTGCAGAGCA GTAATAATGC TATGGCTGTT GCCCTGGGTC ACTCAGGGCC TGGCTGTGCC
181     TAGGAGTAGC AGTCCTGACT GGGCTCAGTG CCAGCAGCTC TCTCGGAATC TCTGCATGCT
241     AGCCTGGAAC GCACATGCAC CAGCGGGACA TATGAATCTA CTAAGAGAAG AAGAGGATGA
301     AGAGACTAAA AATAATGTGC CCCGTATCCA GTGTGAAGAT GGTGTGACC CACAAGGACT
361     CAAGGACAAC AGCCAGTTCT GCTTGCAAAG GATCCGCCAA GGTCTGGCTT TTTATAAGCA
421     CCTGCTTGAC TCTGACATCT TCAAAGGGGA GCCTGCTCTA CTCCCTGATA GCCCCATGGA
481     GCAACTTCAC ACCTCCCTAC TAGGACTCAG CCAACTCCTC CAGCCAGAGG ATCACCCCCG
541     GGAGACCCAA CAGATGCCCA GCCTGAGTTC TAGTCAGCAG TGGCAGCGCC CCCTTCTCCG
601     TTCCAAGATC CTTCTGAAGCC TCCAGGCCTT TTTGGCCATA GCTGCCCGGG TCTTTGCCCA
661     CGGAGCAGCA ACTCTGACTG AGCCCTTAGT GCCAACAGCT TAAggatgcc caggttccca
721     tggctaccat gataagacta atctatcagc ccagacatct accagttaat taaccatta
781     ggacttgtgc tgttcttgtt tcgtttgttt tgcgtgaagg gcaaggacac cattattaa
841     gagaaaagaa acaaacccca gagcaggcag ctggctagag aaaggagctg gagaagaaga
901     ataaagtctc gagcccttgg ccttggaagc gggcaagcag ctgctgggcc tgaggggaag
961     ggggcggtgg catcgagaaa ctgtgagaaa acccagagca tcagaaaaag tgagcccagg
1021    ctttggccat tatctgtaag aaaaacaaga aaaggggaac attatacttt cctgggtggc
1081    tcagggaaat gtgcagatgc acagtactcc agacagcagc tctgtacctg cctgctctgt
1141    ccctcagttc taacagaatc tagtcactaa gaactaacag gactaccaat acgaactgac
1201    aaatactacc actatgacct gtgacaaagc tgcataattta ttaagtggga agggaaacttt
1261    tgatattatt tatccttgta acagtataga tgatggttat ttattctatt tataaggaat
1321    tatgtatttt tttttcaata aagatttatt tatgtggc

```

Characters labeled in red color : the coding sequence

Characters labeled in green color : the putative AU-rich elements (AREs)

**Supplemental Fig. 3. LPS-induced IL-23 p19 expression is dependent on MyD88/c-Rel pathway in macrophages**

**A**

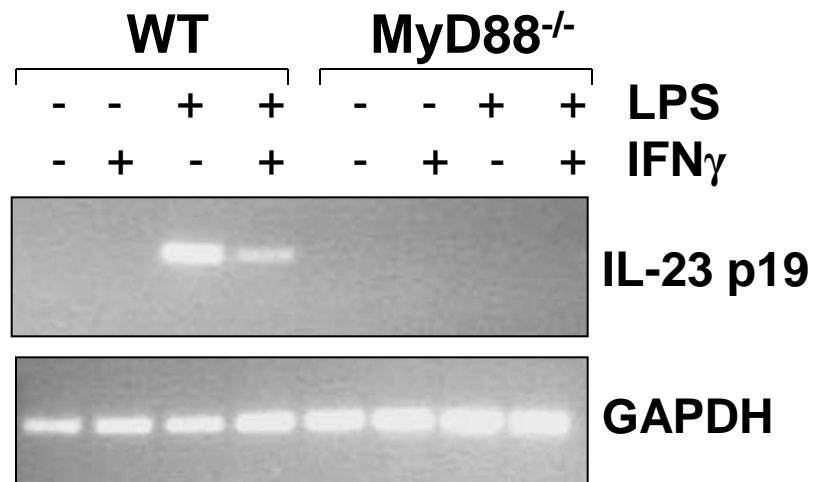

**B**

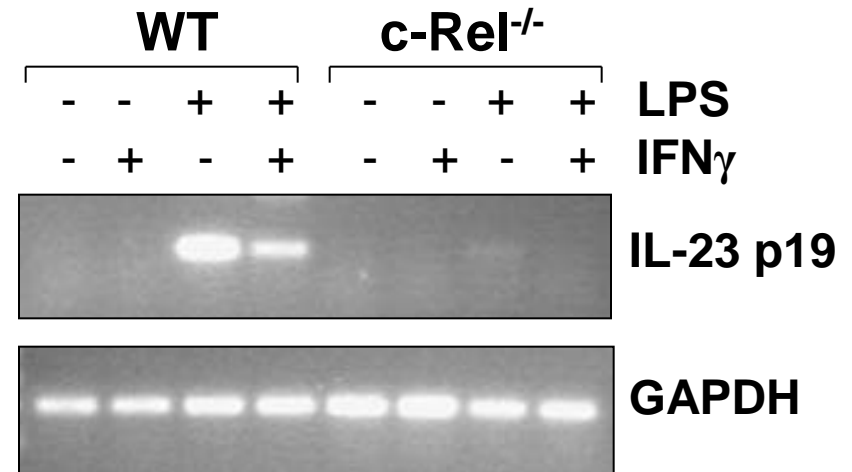

**Supplemental Fig. 4. The inhibitory effect of IFN- $\gamma$  on LPS-induced p19 expression does not need de novo protein synthesis**

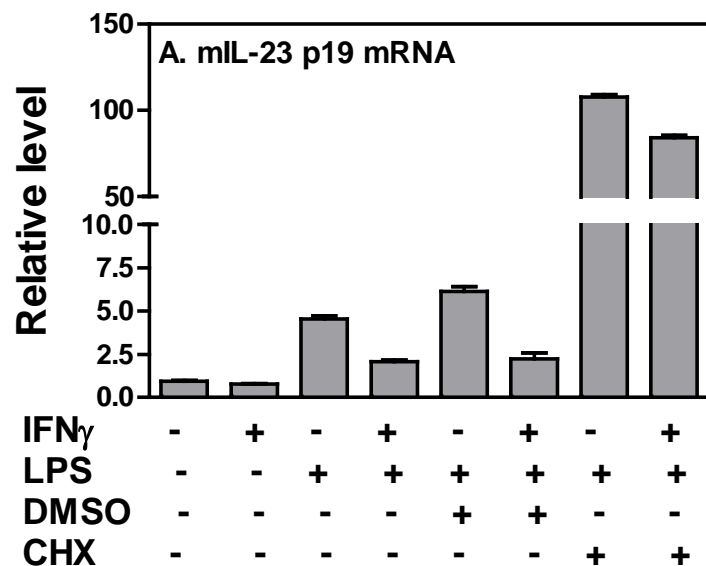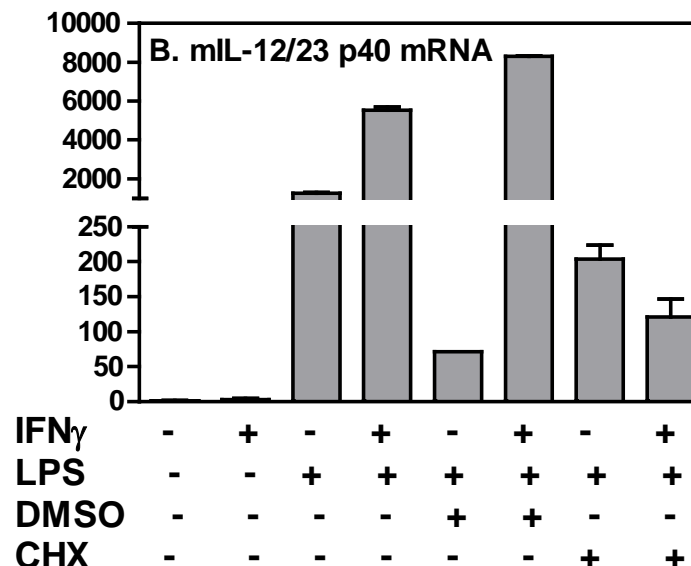

**Supplemental Fig. 5. Spontaneous joint inflammation in TTP knockout mice**

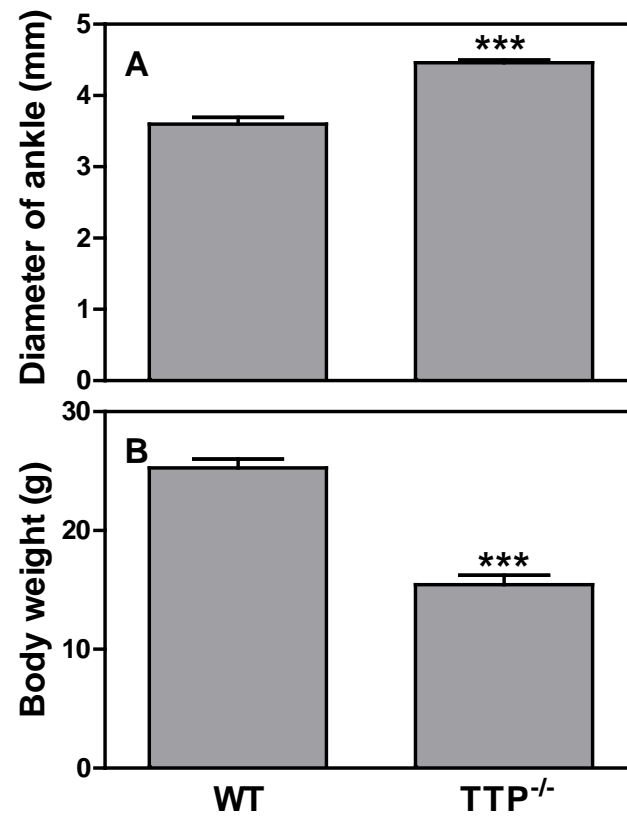

## **Supplemental figure legends**

**Supplemental figure 1. Differential effects of IFN- $\gamma$  on p19 and p35 mRNA expression in mouse peritoneal macrophages.** Total RNA was isolated from peritoneal macrophages of wild type C57BL/6 mice and subjected to measure p19 (A), p40 (B) and p35 (C) mRNA expression by qRT-PCR. Data were normalized relative to GAPDH mRNA expression levels in each respective sample and further normalized to the results from the un-treated group (Med), which was set as 1. Data are representative of one of three separate experiments with similar results.

**Supplemental figure 2. Schematic of mouse IL-23 p19 3'UTR.** Listed is the complete sequence of IL-23 p19 mRNA (accession number: AF301619). The translated region starting with ATG is labeled in red color, whereas both 5'UTR and 3'UTR are represented in black and white. Within the 3'UTR region, there are six putative ARE sites labeled in green adjacent to the 3'end.

**Supplemental figure 3. MyD88 and NF-kB c-Rel are critical for IL-23 p19 expression.** Total RNA was extracted from peritoneal macrophages of WT, MyD88<sup>-/-</sup> (A), and c-Rel<sup>-/-</sup> (B) mice treated with IFN- $\gamma$ , LPS, or IFN- $\gamma$  plus LPS for 4 h and subjected to RT-PCR analysis for p19 mRNA expression. GAPDH was served as loading control. Data represented pooled RNA from four mice.

**Supplemental figure 4. New protein synthesis is not required for IFN- $\gamma$ -mediated p19 mRNA inhibition.**  $3 \times 10^6$  peritoneal macrophages isolated from C57BL/6 mice were cultured in 2 ml RPMI1640 complete medium with 10% FBS and first stimulated with 1  $\mu$ g/ml LPS for 30 min, followed by addition of 3  $\mu$ l cycloheximide (10  $\mu$ g/ml) for additional 30 min. Then 10

ng/ml IFN- $\gamma$  was added into the designed groups for 4 h as indicated. Same amount of DMSO (3  $\mu$ l) was added to cells treated with LPS or IFN- $\gamma$  plus LPS as negative controls. Total RNA was extracted and p19 (**A**) and p40 (**B**) mRNA expression measured by qRT-PCR. Data were normalized relative to GAPDH mRNA expression levels in each respective sample and further normalized to the results from the un-treated group, which was set as 1. Results shown are one of two independent experiments with similar results.

**Supplemental figure 5. Spontaneous arthritis happens in TTP knockout mice.** For TTP knockout and wild type mice, the diameter of hind ankles and body weight were monitored every 2-3 days. The ankle sizes in diameters in two dimensions (horizontal and vertical) (**A**) and body weight (**B**) are shown for WT and TTP knockout mice at age 56 days. Data represent 7 mice in each group with standard deviations (SD). \*\*\*:  $p < 0.0001$  between two groups.
